# Supplementary material for: EspP2 Regulates the Adhesion of Glaesserella parasuis via Rap1 Signaling Pathway
Source: MDPI journal article supplement (doi:10.3390/ijms25084570), 2024-04-22
Supplement: s1 [file s1]

## *Supplementary Material*

### Supplementary Tables

Table S1. Strains and plasmids were used in this study.

| Primers                     | Primer sequences (5'→3')                           | products (bp) |
|-----------------------------|----------------------------------------------------|---------------|
| P1 ( <i>EspP2L-F</i> )      | ctatgacatgattacgaattcCGAAACTTGCGG<br>AACATCTT      | 620 bp        |
| P2 ( <i>EspP2L-R</i> )      | gcagggttcccaaccttacTATGTTCTCCTTC<br>AAATCATTGG     |               |
| P3 ( <i>EspP2R-F</i> )      | ggggttcgaaatgaccgaccCATCAATATAGG<br>GTAATTTAAGAA   | 611 bp        |
| P4 ( <i>EspP2R-R</i> )      | caggtcgactctagaggatccATAGACAACGA<br>AAGAGAGTACC    |               |
| P5 (Kan-F)                  | GTAAGGTTGGGAAGCCCTGC                               | 935 bp        |
| P6 (Kan-R)                  | GGTCGGTCATTTCGAACCCC                               |               |
| P7 (GPS-F)                  | ACAACCTGCAAGTACTTATCGGGAT                          | 276 bp        |
| P8 (GPS-R)                  | TAGCCTCCTGTCTGATATTCCCACG                          |               |
| P9 ( <i>EspP2-F</i> )       | TGAAGCTCAGACTTATTGGGCA                             | 2202 bp       |
| P10 ( <i>EspP2-R</i> )      | GCCTATACTTAACTTATCAT                               |               |
| P11 (pK18-F)                | CTGGCACGACAGGTTTCC                                 | 342 bp        |
| P12 (pK18-R)                | GCCTCTTCGCTATTACGC                                 |               |
| P13 ( <i>rEspP2-F</i> )     | CAGACTTATTGGGCAAGTG                                | 2271 bp       |
| P14 ( <i>rEspP2-R</i> )     | GAACGAGTATCTTACATTAGAATTA                          |               |
| P15 (32a- <i>rEspP2-F</i> ) | gccatggctgatatcgatccCAGACTTATTGG<br>GCAAGTG        | 2313 bp       |
| P16 (32a- <i>rEspP2-R</i> ) | gtggtggtggtggtgctcgagGAACGAGTATC<br>TTACATTAGAATTA |               |
| P17 (CL-1-F)                | CGGATGGCTGTCATTGGG                                 | 263 bp        |
| P18 (CL-1-R)                | GGCGAAGGTTTTGGATAGG                                |               |

|               |                          |        |
|---------------|--------------------------|--------|
| P19 (OCLN-F)  | CCCTTTCGGACTATGCGG       | 282 bp |
| P20 (OCLN-R)  | CCGTCGTGTAGTCTGTCTCG     |        |
| P21 (Actin-F) | CTTCCTGGGCATGGAGTCC      | 201 bp |
| P22 (Actin-R) | GGCGCGATGATCTTGATCTTC    |        |
| P23 (RAP1B-F) | GGCTCAGGAGGCGTTGGAAA     | 240 bp |
| P24 (RAP1B-R) | TGTGGACTGTGCTGTGATGGAATA |        |

Table S2. Reads and reference genome comparison list.

| Sample name | Total reads | Total mapped         | Multiple mapped    | Uniquely mapped      | Read-1               | Read-2               |
|-------------|-------------|----------------------|--------------------|----------------------|----------------------|----------------------|
| E0_1        | 43966372    | 41750819<br>(94.96%) | 1439158<br>(3.27%) | 40311661<br>(91.69%) | 20259617<br>(46.08%) | 20052044<br>(45.61%) |
| E0_2        | 43715322    | 41579416<br>(95.11%) | 1384224<br>(3.17%) | 40195192<br>(91.95%) | 20180590<br>(46.16%) | 20014602<br>(45.78%) |
| E0_3        | 41046548    | 39076519<br>(95.2%)  | 1314749<br>(3.2%)  | 37761770<br>(92.0%)  | 18935780<br>(46.13%) | 18825990<br>(45.86%) |
| E12_1       | 40370164    | 38485663<br>(95.33%) | 1167655<br>(2.89%) | 37318008<br>(92.44%) | 18721221<br>(46.37%) | 18596787<br>(46.07%) |
| E12_2       | 44944598    | 42858973<br>(95.36%) | 1356855<br>(3.02%) | 41502118<br>(92.34%) | 20839307<br>(46.37%) | 20662811<br>(45.97%) |
| E12_3       | 44151258    | 42135910<br>(95.44%) | 1382831<br>(3.13%) | 40753079<br>(92.3%)  | 20460195<br>(46.34%) | 20292884<br>(45.96%) |
| E36_1       | 42907506    | 40795362<br>(95.08%) | 1372463<br>(3.2%)  | 39422899<br>(91.88%) | 19818134<br>(46.19%) | 19604765<br>(45.69%) |
| E36_2       | 44894094    | 42710168<br>(95.14%) | 1363724<br>(3.04%) | 41346444<br>(92.1%)  | 20761566<br>(46.25%) | 20584878<br>(45.85%) |
| E36_3       | 45841584    | 43510641<br>(94.92%) | 1410640<br>(3.08%) | 42100001<br>(91.84%) | 21178863<br>(46.2%)  | 20921138<br>(45.64%) |

## Supplementary Figures

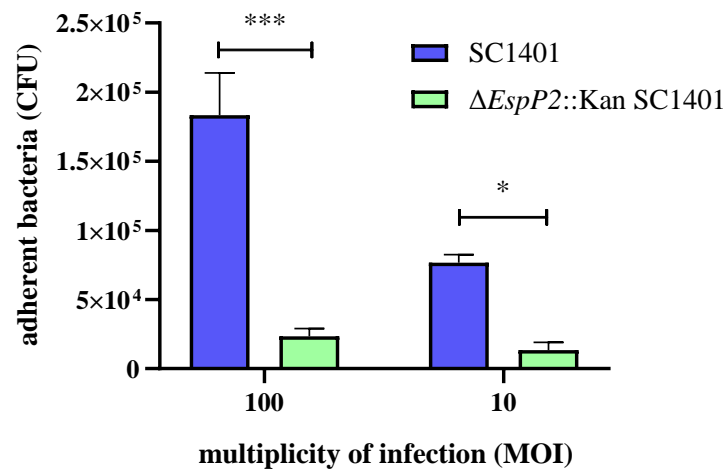

**Figure S1. Adhesion of wild type *G. parasuis* and  $\Delta\text{EspP2}::\text{Kan}$  to NPTr cells.** Error bars represent the standard deviation of three independent experiments. Significant differences between groups are indicated by \*  $p < 0.1$  and \*\*\*  $p < 0.001$ .

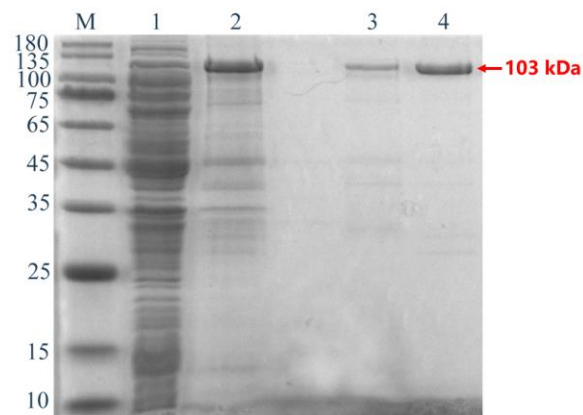

**Figure S2. SDS-PAGE analysis of rEspP2.** M: Protein molecular standard, 1: pET-32a-rEspP2-BL21 supernatant after ultrasonic crushing, 2: pET-32a-rEspP2-BL21 inclusion body after ultrasonic crushing, 3: purified rEspP2 protein, 4: concentrated rEspP2 protein.

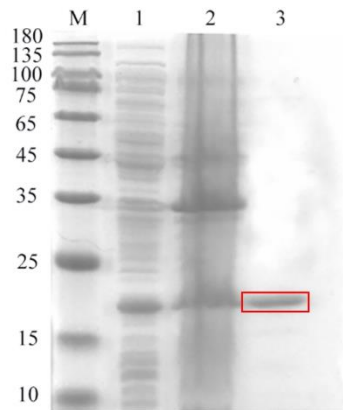

**Figure S3. SDS-PAGE analysis of His-tag protein.** M: Protein molecular standard, 1: pET-32a-BL21 supernatant after ultrasonic crushing, 2: pET-32a-BL21 inclusion body after ultrasonic crushing, 3: purified His-tag protein.

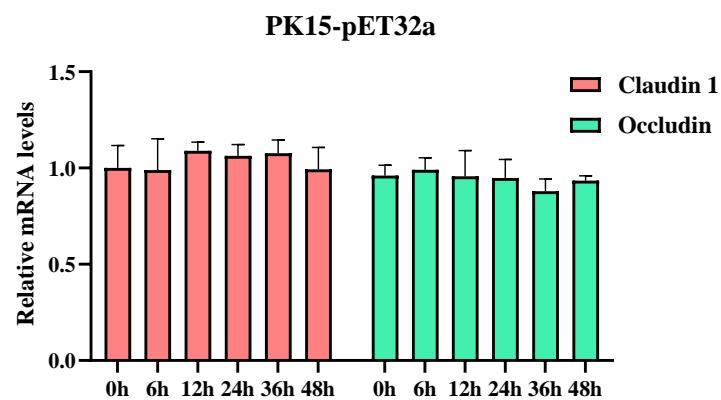

**Figure S4. RT-PCR results of *claudin-1* and *occludin* levels in His-tag protein treated PK15 cells.**

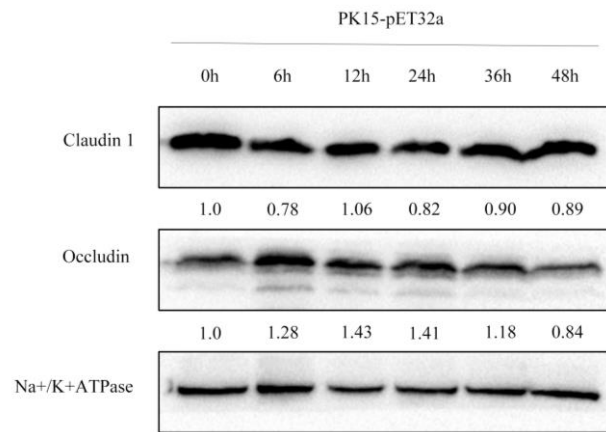

**Figure S5. Representative western blot of claudin-1 and occludin in His-tag protein treated PK15 cells.** Expression level of claudin-1 and occludin in PK15 cells after incubation with His-tag protein.

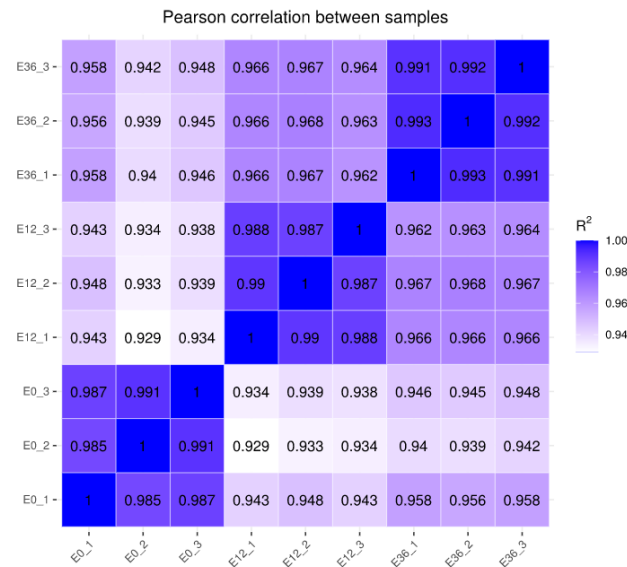

**Figure S6. Heat map of the correlation coefficient between samples.** E0\_1-E0\_3 represents three biological duplications of 0 h, E12\_1-E12\_3 represents three biological duplications of 12 h, E36\_1-E36\_3 represents three biological duplications of 36 h,  $R^2$  represents the square of Pearson correlation coefficient.  $R^2 > 0.95$  between the three biological replicates, indicating a good correlation.

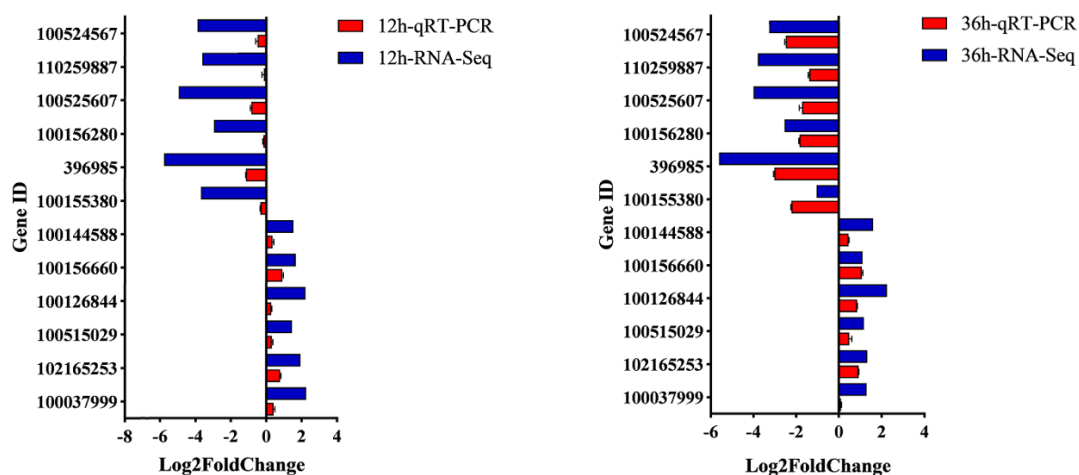

**Figure S7. Validation of RNA-Sequencing results by quantitative RT-PCR.** Log2 fold change comparison of RNA-Seq (blue bars) and quantitative real-time PCR (red bars) for six differentially expressed genes upregulated at 12 h and 36 h, six genes downregulated at 12 h and 36 h. RT-PCR results showed general consistency with RNA-seq data.
